# Supplementary material for: Novel CeMoxOy-clay hybrid catalysts with layered structure for selective catalytic reduction of NOx by NH3
Source: Royal Society of Chemistry journal article supplement (doi:10.1039/c7ra12153a), 2018-01-01
Supplement: c7ra12153a1.pdf [file c7ra12153a1.pdf]

**Novel CeMo<sub>x</sub>O<sub>y</sub>-clay hybrid catalysts with layered structure for  
selective catalytic reduction of NO<sub>x</sub> by NH<sub>3</sub>**

Boyang Xu,<sup>a,b,c</sup> Youlin Liu,<sup>a,b,c,\*</sup> Yuesong Shen<sup>a,b,c,\*</sup> and Shemin Zhu<sup>a,b,c</sup>

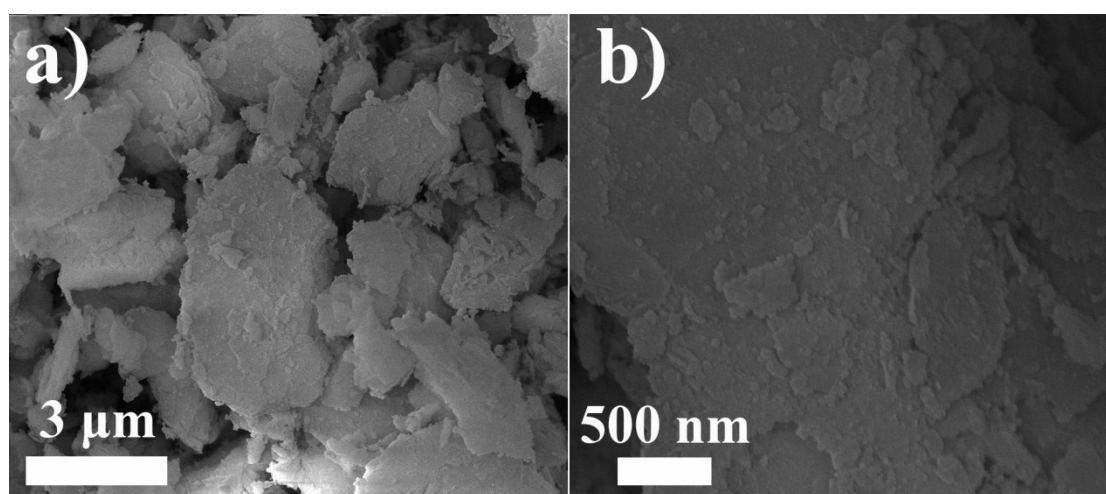

Figure S1 TEM of the CeMo<sub>0.15</sub>O<sub>x</sub>-OC-550 catalyst

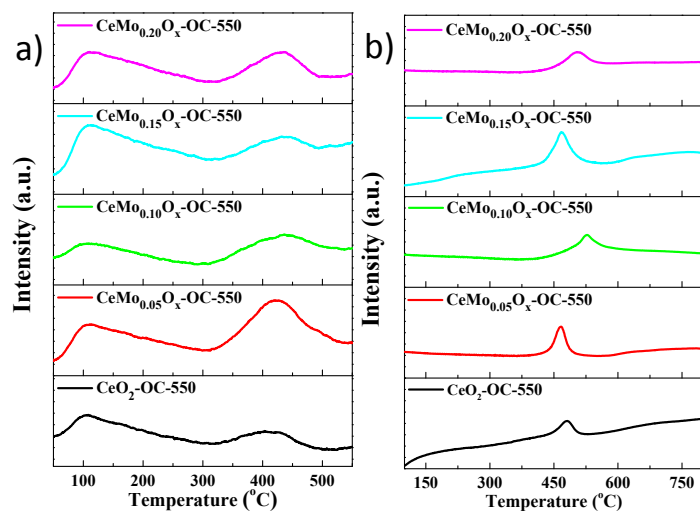

Figure S2 a) NH<sub>3</sub>-TPD and b) H<sub>2</sub>-TPR of CeMo<sub>x</sub>O<sub>y</sub>-OC-550 catalysts with different Mo/Ce ratios

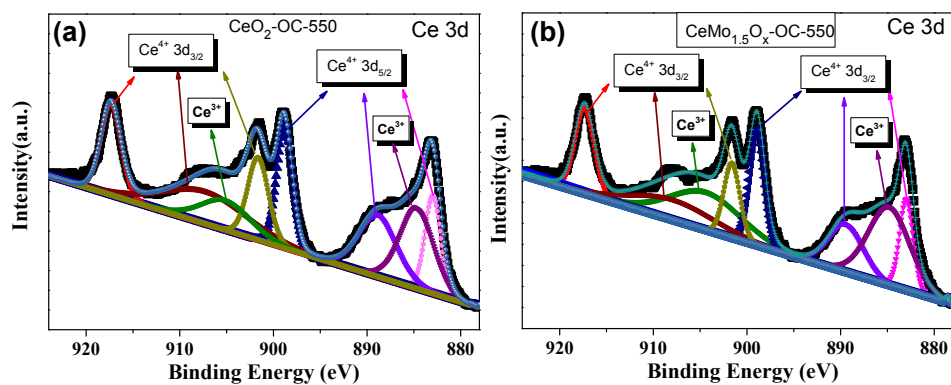

Figure S3 XPS spectra of Ce 3d for CeO<sub>2</sub>-OC-550 and CeMo<sub>0.15</sub>O<sub>x</sub>-OC-550 catalysts.

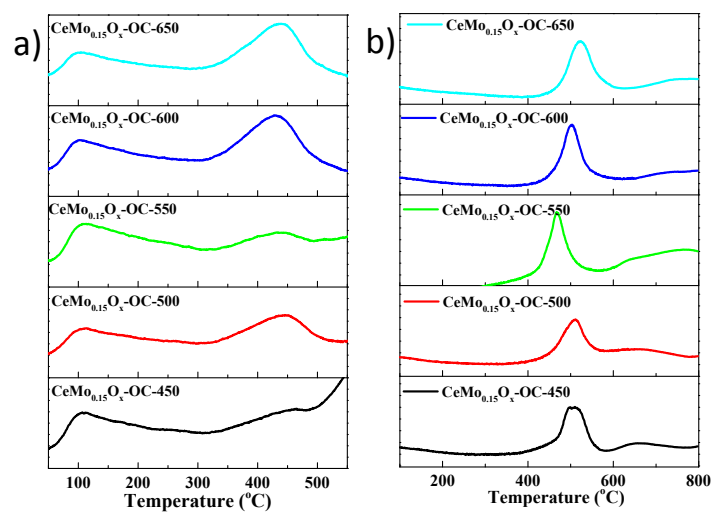

Figure S4 a)  $\text{NH}_3$ -TPD and b)  $\text{H}_2$ -TPR of  $\text{CeMo}_{0.15}\text{O}_x\text{-OC-T}$  catalysts with different calcination temperature.
